# Supplementary material
Source: Springer Nature journal article supplement (https://www.springermedizin.de/resource/supplementary/12906_2012_1049_MOESM4_ESM.pdf/9520350)

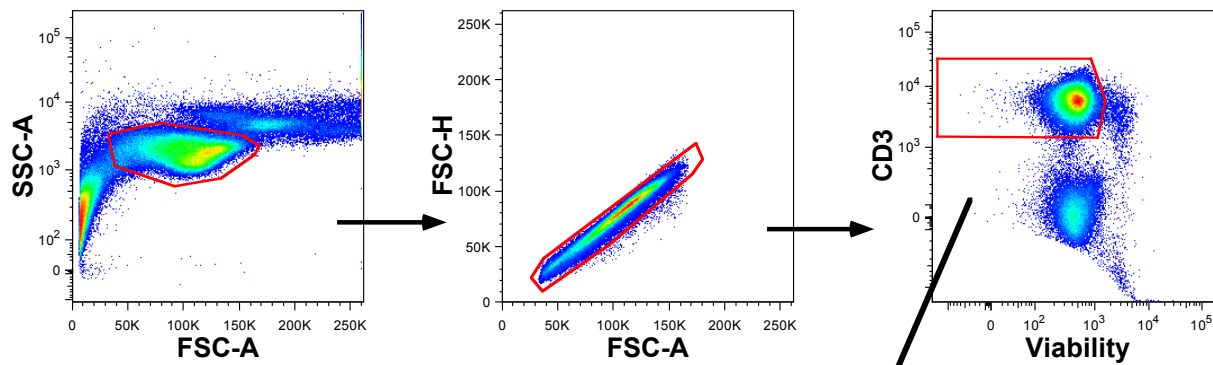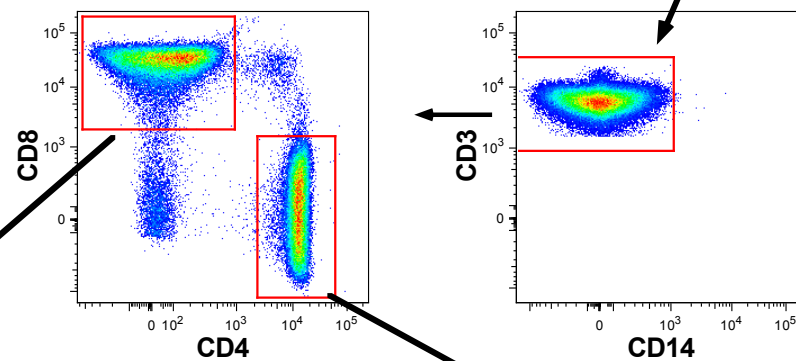

**CD8+**

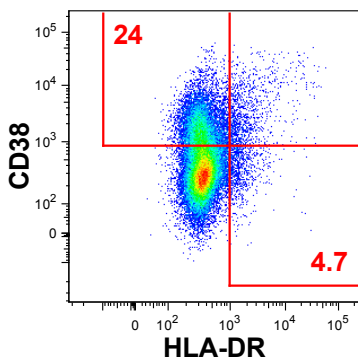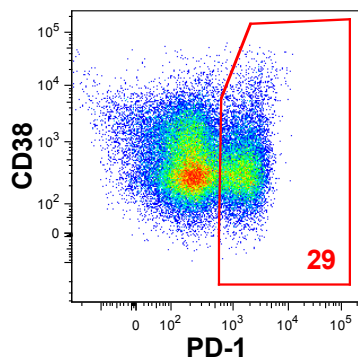

**CD4+**

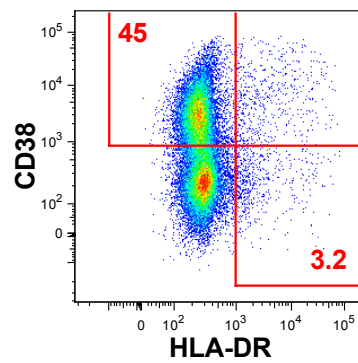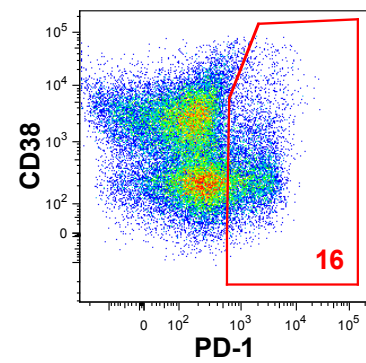

Supplement: MOESM4 [file 9520350]
